# Supplementary material for: Identification of COVID-19-Associated DNA Methylation Variations by Integrating Methylation Array and scRNA-Seq Data at Cell-Type Resolution
Source: Genes (Basel). 2022 Jun 21;13(7):1109. doi: 10.3390/genes13071109 (PMC9322889; doi:10.3390/genes13071109)
Supplement: Supplementary file 1 [file genes-13-01109-s001.zip › Supplementary Table S1.xls]

## Sheet: S0
	S1: Differentially methylated genes（DMG） with significantly correlation between DNAm with expression(Pearson correlation coefficient greater than 0.5 and the P value less than 0.05)
	S2:Methylated variant gene annotation for discovery dataset（COVID vs Control）
	S3:Methylated variant gene annotation for discovery dataset（Mild vs Control）
	S4:Methylated variant gene annotation for discovery dataset（Severe vs Control）
	S5:Methylated variant gene annotation for validation dataset（COVID vs Control）
	S6:Methylated variant gene annotation for validation dataset（Mild vs Control）
	S7:Methylated variant gene annotation for validation dataset（Severe vs Control）

## Sheet: S1
S1:Differentially methylated genes（DMG） with significantly correlation between DNAm with expression(Pearson correlation coefficient greater than 0.5 and the P value less than 0.05)
probe_id	adj_p_value	feature	gene	cgi	CHR	gene	cor_r	pvalue
cg23384708	7.53046e-22	Body	TNF	shelf	6	TNF	-0.584929	2.04963e-10
cg24727216	1.25277e-18	Body	ASXL1	shore	20	ASXL1	-0.572597	5.92334e-10
cg13727957	3.56245e-18	Body	NAA35	opensea	9	NAA35	0.551865	3.20515e-09
cg10798745	3.6139e-18	TSS200	CD160	shore	1	CD160	-0.650373	3.20672e-13
cg01833923	1.22349e-17	1stExon	GNGT2	opensea	17	GNGT2	-0.610362	1.98426e-11
cg01833923	1.22349e-17	1stExon	GNGT2	opensea	17	ABI3	-0.530373	1.64053e-08
cg26003388	1.90703e-17	Body	TMC8	shore	17	TMC8	-0.691241	2.38604e-15
cg26003388	1.90703e-17	Body	TMC8	shore	17	TMC6	-0.66002	1.07981e-13
cg20477259	2.39128e-17	Body	TNF	shelf	6	TNF	-0.617317	1.01002e-11
cg17250262	3.19665e-17	Body	LBH	shore	2	LBH	-0.857779	8.6581e-30
cg05595469	3.41664e-17	Body	PCNT	island	21	PCNT	-0.787291	4.34224e-22
cg08315613	3.60133e-17	5'UTR	SMARCA4	shore	19	SMARCA4	-0.735722	4.18595e-18
cg04500986	4.30227e-17	TSS1500	TNFRSF25	shore	1	TNFRSF25	-0.783247	9.74807e-22
cg04500986	4.30227e-17	TSS1500	TNFRSF25	shore	1	PLEKHG5	-0.632434	2.19469e-12
cg09914304	5.7895e-17	5'UTR	PRF1	shore	10	PRF1	-0.567104	9.37146e-10
cg19942256	7.58351e-17	1stExon	KCNA3	island	1	KCNA3	-0.657567	1.42941e-13
cg16115689	1.01155e-16	Body	RPTOR	opensea	17	RPTOR	-0.705677	3.46334e-16
cg07571745	1.28917e-16	TSS1500	LCK	shore	1	LCK	-0.706715	3.00104e-16
cg01377358	1.76425e-16	Body	ASXL1	shore	20	ASXL1	-0.669738	3.46223e-14
cg13925011	2.89794e-16	1stExon	KCNA3	island	1	KCNA3	-0.561595	1.47227e-09
cg22948288	3.18519e-16	TSS1500	MEOX1	opensea	17	MEOX1	-0.566397	9.93525e-10
cg18728264	5.00774e-16	1stExon	CXCR5	opensea	11	CXCR5	-0.576395	4.29206e-10
cg26501139	5.12183e-16	3'UTR	TXNL4A	opensea	18	TXNL4A	0.562542	1.36304e-09
cg21057323	6.39594e-16	Body	CDC42BPB	opensea	14	CDC42BPB	-0.589442	1.37446e-10
cg21217270	6.62756e-16	Body	RUNX3	shelf	1	RUNX3	-0.724918	2.18992e-17
cg17972213	6.84501e-16	Body	S1PR1	shelf	1	S1PR1	-0.569008	8.00137e-10
cg03769939	7.80297e-16	Body	RUNX3	shore	1	RUNX3	-0.780314	1.73351e-21
cg10802680	8.57674e-16	TSS200	DIABLO	shore	12	DIABLO	-0.662893	7.74813e-14
cg05306109	1.19329e-15	Body	ITPKB	shore	1	ITPKB	-0.570485	7.07301e-10
cg23973885	1.29286e-15	TSS1500	MXRA8	shelf	1	MXRA8	-0.526417	2.18868e-08
cg05799811	1.72861e-15	Body	CD247	opensea	1	CD247	-0.810237	3.08993e-24
cg07835154	2.49445e-15	Body	NCOR2	island	12	NCOR2	-0.50543	9.51458e-08
cg01837846	2.99003e-15	5'UTR	KLHL29	opensea	2	KLHL29	-0.51042	6.76906e-08
cg04674060	3.13703e-15	Body	CHD3	shelf	17	CHD3	-0.641217	8.69465e-13
cg12520276	3.52275e-15	Body	DIP2C	shore	10	DIP2C	-0.605087	3.2758e-11
cg16962442	3.82938e-15	Body	RASA3	opensea	13	RASA3	0.726553	1.71365e-17
cg13876315	4.46655e-15	Body	SIT1	shelf	9	SIT1	-0.822652	1.59348e-25
cg00810292	5.79299e-15	Body	TBC1D4	opensea	13	TBC1D4	-0.782266	1.18281e-21
cg24724596	7.0502e-15	TSS1500	LIM2	opensea	19	LIM2	-0.53885	8.73394e-09
cg12018809	8.23851e-15	1stExon	LPAR5	opensea	12	LPAR5	-0.51347	5.48233e-08
cg22318806	8.40221e-15	5'UTR	LTA	opensea	6	LTA	-0.720874	3.98788e-17
cg07906046	8.4139e-15	Body	ADCY9	opensea	16	ADCY9	-0.637723	1.26111e-12
cg19529732	1.04938e-14	TSS200	DIABLO	shore	12	DIABLO	-0.766752	2.2231e-20
cg03950000	1.4452e-14	TSS1500	SLAMF1	opensea	1	SLAMF1	-0.565975	1.02873e-09
cg23525051	1.77601e-14	Body	RASGRP1	shelf	15	RASGRP1	-0.784374	7.79394e-22
cg11947857	1.78522e-14	Body	DAZAP1	shelf	19	DAZAP1	-0.651199	2.92571e-13
cg14537825	2.02729e-14	Body	ZAP70	shelf	2	ZAP70	-0.757615	1.12755e-19
cg20973735	2.11731e-14	Body	AIP	shore	11	AIP	-0.552656	3.01151e-09
cg06987246	2.56757e-14	Body	ZNF853	shelf	7	ZNF853	-0.852131	4.97112e-29
cg03050965	2.74859e-14	Body	S1PR1	shelf	1	S1PR1	-0.508427	7.75973e-08
cg25211348	2.78436e-14	TSS1500	CHI3L2	opensea	1	CHI3L2	-0.664881	6.14551e-14
cg17709873	2.99416e-14	5'UTR	LTA	opensea	6	LTA	-0.727083	1.58197e-17
cg03559915	2.99771e-14	Body	RPS6KB2	shore	11	RPS6KB2	-0.525562	2.32825e-08
cg14099345	3.07443e-14	Body	USP20	shore	9	USP20	-0.594016	9.10972e-11
cg14021478	3.1338e-14	Body	CUTA	shore	6	CUTA	-0.643358	6.9067e-13
cg13841742	3.40342e-14	TSS1500	OCIAD2	shore	4	OCIAD2	-0.585889	1.88351e-10
cg20171453	3.50955e-14	TSS1500	RHOH	opensea	4	RHOH	-0.659467	1.15056e-13
cg23892310	4.13334e-14	Body	TBCD	shore	17	TBCD	-0.697814	1.00504e-15
cg17322655	4.19668e-14	TSS1500	PDCD1	shelf	2	PDCD1	-0.615472	1.21007e-11
cg15872458	4.20195e-14	Body	ZNF385A	shore	12	ZNF385A	0.522547	2.89159e-08
cg22069247	4.38665e-14	Body	NMUR1	shore	2	NMUR1	-0.578261	3.65819e-10
cg14001486	4.4693e-14	Body	PRKCH	opensea	14	PRKCH	-0.772164	8.20191e-21
cg06146977	4.8821e-14	Body	EPSTI1	opensea	13	EPSTI1	0.546592	4.83558e-09
cg23456595	5.42765e-14	Body	PTPRCAP	island	11	PTPRCAP	-0.53178	1.47929e-08
cg17843665	5.69971e-14	Body	MIPEP	opensea	13	MIPEP	-0.585308	1.98248e-10
cg01300096	5.7678e-14	Body	CUTA	shore	6	CUTA	-0.648051	4.14274e-13
cg09896765	5.97918e-14	Body	TPRKB	shelf	2	TPRKB	0.552622	3.0195e-09
cg07192734	6.32369e-14	Body	ACSF3	shore	16	ACSF3	0.515721	4.68602e-08
cg22144450	6.76168e-14	Body	ORMDL3	shelf	17	ORMDL3	-0.589199	1.40456e-10
cg04982781	7.40943e-14	Body	RPL3	shore	22	RPL3	-0.626709	3.95052e-12
cg12231584	7.64497e-14	Body	LRRC47	shore	1	LRRC47	0.6048	3.3655e-11
cg17150898	8.18381e-14	1stExon	FBXL14	shore	12	FBXL14	-0.50979	7.06834e-08
cg01860774	8.18605e-14	5'UTR	ZBTB25	shore	14	ZBTB25	-0.716717	7.30439e-17
cg05551825	8.25636e-14	Body	RNF216	opensea	7	RNF216	-0.531767	1.48066e-08
cg14614581	8.32826e-14	Body	SPOCK2	shelf	10	SPOCK2	-0.884131	8.03674e-34
cg19914554	8.49339e-14	1stExon	CD7	shore	17	CD7	-0.540277	7.84068e-09
cg02374486	8.52049e-14	TSS1500	PRF1	shelf	10	PRF1	-0.646579	4.86761e-13
cg21261158	9.04221e-14	Body	RASA3	island	13	RASA3	-0.52508	2.41061e-08
cg12433559	9.25564e-14	TSS200	PRF1	shelf	10	PRF1	-0.674253	2.01142e-14
cg20186396	9.69438e-14	TSS200	CD7	shore	17	CD7	-0.556362	2.24405e-09
cg24452282	1.05615e-13	TSS1500	TNF	opensea	6	TNF	-0.616109	1.13709e-11
cg11760500	1.07771e-13	Body	ETS1	opensea	11	ETS1	-0.682661	7.12913e-15
cg06958535	1.10922e-13	1stExon	LAX1	opensea	1	LAX1	-0.558332	1.9165e-09
cg23510258	1.15358e-13	Body	TBCD	opensea	17	TBCD	-0.594564	8.66806e-11
cg21163717	1.18635e-13	Body	DOK2	island	8	DOK2	-0.698073	9.70861e-16
cg01791634	1.23157e-13	Body	TMC8	shore	17	TMC8	-0.523853	2.63325e-08
cg11336061	1.27392e-13	Body	RUNX3	shore	1	RUNX3	-0.743052	1.30018e-18
cg15498134	1.27903e-13	Body	RUNX3	opensea	1	RUNX3	-0.831888	1.50512e-26
cg04278905	1.43468e-13	TSS1500	KAT2A	shore	17	KAT2A	0.526337	2.20146e-08
cg17618872	1.45351e-13	3'UTR	CBFA2T2	shelf	20	CBFA2T2	-0.55503	2.49535e-09
cg00795812	1.48793e-13	TSS1500	PDCD1	shelf	2	PDCD1	-0.573485	5.49585e-10
cg02740606	1.518e-13	Body	CORO1B	shelf	11	PTPRCAP	-0.523679	2.66628e-08
cg24940706	1.55185e-13	Body	TCF3	shore	19	TCF3	-0.724166	2.4501e-17
cg17056676	1.66857e-13	Body	ABLIM1	opensea	10	ABLIM1	-0.714105	1.06268e-16
cg03254928	1.73742e-13	TSS1500	CD3G	opensea	11	CD3G	-0.779694	1.95544e-21
cg03254928	1.73742e-13	TSS1500	CD3G	opensea	11	CD3D	-0.841149	1.21771e-27
cg19397991	1.75128e-13	Body	PASK	opensea	2	PASK	-0.763547	3.96228e-20
cg25256924	1.83641e-13	3'UTR	CORO1B	shelf	11	PTPRCAP	-0.539777	8.1431e-09
cg09453312	1.83783e-13	1stExon	ITK	opensea	5	ITK	-0.688156	3.55213e-15
cg19453686	1.90074e-13	TSS1500	TC2N	opensea	14	TC2N	-0.714571	9.94261e-17
cg26960939	2.04342e-13	Body	CCR7	opensea	17	CCR7	-0.601329	4.65607e-11
cg07248223	2.04823e-13	Body	CCR7	opensea	17	CCR7	-0.57227	6.08898e-10
cg26382697	2.10035e-13	Body	CD81	island	11	CD81	-0.703074	4.94702e-16
cg26360197	2.1025e-13	Body	RPTOR	shelf	17	RPTOR	-0.656592	1.59687e-13
cg03889044	2.14749e-13	TSS1500	PDCD1	shelf	2	PDCD1	-0.569396	7.74668e-10
cg17818435	2.21531e-13	TSS200	SOAT2	opensea	12	SOAT2	-0.550558	3.55136e-09
cg05132828	2.24146e-13	5'UTR	PITPNM2	opensea	12	PITPNM2	-0.507426	8.30838e-08
cg24250717	2.31284e-13	Body	HSPB11	opensea	1	HSPB11	0.589023	1.42683e-10
cg02423817	2.31508e-13	Body	PTPRCAP	island	11	PTPRCAP	-0.504051	1.04431e-07
cg25662857	2.42573e-13	TSS200	CD7	shore	17	CD7	-0.512223	5.97745e-08
cg09473725	2.46622e-13	Body	CD247	opensea	1	CD247	-0.816028	7.97069e-25
cg13477354	2.48285e-13	Body	S1PR1	shelf	1	S1PR1	-0.51205	6.04901e-08
cg11257888	2.49021e-13	TSS1500	RCAN3	shore	1	RCAN3	-0.606642	2.82864e-11
cg17560340	2.50713e-13	TSS1500	RNMTL1	shore	17	GLOD4	-0.581069	2.87074e-10
cg01519464	2.57357e-13	3'UTR	RCAN3	island	1	RCAN3	-0.814367	1.18116e-24
cg14094409	2.61213e-13	TSS200	DIABLO	shore	12	DIABLO	-0.77427	5.52367e-21
cg23510807	2.84746e-13	3'UTR	LFNG	shore	7	LFNG	-0.525529	2.33389e-08
cg06890522	2.85398e-13	Body	RNASEK	shore	17	C17orf49	-0.590879	1.20868e-10
cg26899718	2.91985e-13	Body	SMPD3	shore	16	SMPD3	-0.572393	6.02609e-10
cg01279933	3.02167e-13	3'UTR	ATG4D	opensea	19	KRI1	-0.750052	4.09908e-19
cg01360627	3.07972e-13	Body	TNF	shelf	6	TNF	-0.609106	2.23785e-11
cg09123760	3.11528e-13	TSS200	DIABLO	shore	12	DIABLO	-0.562075	1.41594e-09
cg08087379	3.12039e-13	TSS1500	TUG1	shore	22	MORC2	0.503119	1.11189e-07
cg18338021	3.12885e-13	Body	GZMM	shelf	19	GZMM	-0.510276	6.83633e-08
cg01157951	3.31418e-13	5'UTR	LTA	opensea	6	LTA	-0.623798	5.30224e-12
cg15880738	3.40493e-13	5'UTR	CD3G	opensea	11	CD3G	-0.894629	1.03883e-35
cg25643644	3.49296e-13	Body	CD3D	opensea	11	CD3D	-0.840633	1.40676e-27
cg00715122	3.49747e-13	Body	TOX	opensea	8	TOX	-0.611827	1.72362e-11
cg14255337	3.54721e-13	Body	KDM2B	shelf	12	KDM2B	-0.762044	5.17936e-20
cg07895132	3.54721e-13	Body	SLFN12L	opensea	17	SLFN12L	0.59884	5.86196e-11
cg13725590	3.75309e-13	3'UTR	DUSP2	shore	2	DUSP2	-0.53847	8.98748e-09
cg12623364	3.896e-13	Body	LEF1	opensea	4	LEF1	-0.553416	2.8361e-09
cg12811871	4.01265e-13	Body	ZFYVE28	opensea	4	ZFYVE28	-0.799318	3.52114e-23
cg25808094	4.16063e-13	Body	TBC1D4	opensea	13	TBC1D4	-0.710509	1.76832e-16
cg06784563	4.39514e-13	Body	NFATC1	island	18	NFATC1	-0.785278	6.5089e-22
cg16928046	4.5624e-13	Body	TBX21	shore	17	TBX21	-0.808367	4.73947e-24
cg11804414	4.7644e-13	TSS200	DIABLO	shore	12	DIABLO	-0.780354	1.71977e-21
cg03431524	4.86578e-13	Body	AGFG2	opensea	7	AGFG2	-0.788736	3.23881e-22
cg15518883	5.43509e-13	Body	SIT1	shelf	9	SIT1	-0.829051	3.15429e-26
cg09032544	5.57647e-13	Body	CD247	opensea	1	CD247	-0.86075	3.34928e-30
cg05656688	5.61698e-13	Body	RUNX3	shore	1	RUNX3	-0.847802	1.80733e-28
cg09802688	6.026e-13	Body	TRAF3IP3	opensea	1	TRAF3IP3	-0.642908	7.25021e-13
cg26348243	6.11929e-13	5'UTR	LTA	opensea	6	LTA	-0.750117	4.05476e-19
cg14278300	6.31431e-13	Body	CD247	opensea	1	CD247	-0.855921	1.55112e-29
cg26477856	6.47148e-13	TSS1500	DGKA	shore	12	DGKA	-0.603113	3.94241e-11
cg14897188	6.82212e-13	Body	RNASEK	shore	17	C17orf49	-0.658745	1.2497e-13
cg26103719	9.57896e-13	3'UTR	FBLN5	opensea	14	FBLN5	-0.670088	3.32095e-14
cg18148314	9.70755e-13	Body	ACOT7	opensea	1	ACOT7	-0.550849	3.47131e-09
cg15497761	1.05538e-12	Body	TRIM46	island	1	TRIM46	0.753907	2.13528e-19
cg14518276	1.20233e-12	Body	TRAF1	shelf	9	TRAF1	-0.863948	1.17558e-30
cg02473123	1.22126e-12	Body	CD7	shelf	17	CD7	-0.580945	2.90179e-10
cg00642501	1.29004e-12	Body	NOP14	shore	4	NOP14	-0.596735	7.11188e-11
cg09934892	1.41834e-12	Body	CLUAP1	opensea	16	CLUAP1	-0.765539	2.76945e-20
cg21805118	1.457e-12	TSS200	DIABLO	shore	12	DIABLO	-0.666151	5.29454e-14
cg22082015	1.62845e-12	Body	NR1D1	shelf	17	NR1D1	-0.596202	7.46666e-11
cg26647600	1.65003e-12	TSS1500	CCR8	opensea	3	CCR8	-0.593509	9.53731e-11
cg05365532	1.66866e-12	TSS1500	LILRB1	opensea	19	LILRB1	-0.516184	4.53655e-08
cg15316716	1.72446e-12	Body	DOK2	island	8	DOK2	-0.665295	5.85435e-14
cg15997393	1.83449e-12	Body	MAD1L1	opensea	7	MAD1L1	-0.56389	1.22098e-09
cg07218880	1.85048e-12	TSS1500	UPF3A	shore	13	UPF3A	-0.591011	1.19451e-10
cg24616382	1.86459e-12	TSS1500	GAL3ST4	shore	7	GAL3ST4	-0.53604	1.07841e-08
cg06096805	1.87183e-12	TSS1500	FAM102A	shore	9	FAM102A	-0.628752	3.20728e-12
cg21400896	1.90071e-12	Body	ABI3	opensea	17	ABI3	-0.603184	3.91631e-11
cg16452866	1.93212e-12	Body	BCL11B	opensea	14	BCL11B	-0.839068	2.17249e-27
cg01637169	1.94436e-12	Body	NUP210	shore	3	NUP210	-0.504446	1.01688e-07
cg07016730	1.96076e-12	Body	SBF1	shore	22	SBF1	-0.559412	1.75686e-09
cg23117250	2.12001e-12	Body	RAB40B	island	17	RAB40B	-0.708393	2.37754e-16
cg10264529	2.14577e-12	TSS1500	PCK2	shore	14	PCK2	0.557733	2.01085e-09
cg25416125	2.20978e-12	5'UTR	DGKA	island	12	DGKA	-0.820656	2.60662e-25
cg01161042	2.26027e-12	Body	ZFYVE28	opensea	4	ZFYVE28	-0.800069	2.99261e-23
cg14192130	2.26086e-12	TSS1500	CCR6	opensea	6	CCR6	-0.684192	5.88094e-15
cg24032269	2.36629e-12	Body	TCOF1	opensea	5	TCOF1	-0.721539	3.61648e-17
cg07573020	2.37399e-12	3'UTR	ANKH	opensea	5	ANKH	-0.793822	1.13298e-22
cg17839611	2.40523e-12	TSS1500	ABI3	opensea	17	ABI3	-0.554095	2.68757e-09
cg17839611	2.40523e-12	TSS1500	ABI3	opensea	17	GNGT2	-0.62548	4.47496e-12
cg01909364	2.46832e-12	TSS1500	MEOX1	opensea	17	MEOX1	-0.59461	8.63212e-11
cg27640064	2.48344e-12	Body	FOXK1	opensea	7	FOXK1	0.559657	1.72243e-09
cg13178170	2.56158e-12	Body	TGFBR3	opensea	1	TGFBR3	-0.611991	1.69649e-11
cg16047279	2.84663e-12	Body	CCR7	opensea	17	CCR7	-0.596816	7.05904e-11
cg14841483	2.9181e-12	Body	ACSL6	opensea	5	ACSL6	-0.627726	3.56205e-12
cg25225693	2.97947e-12	Body	GATS	opensea	7	PVRIG	-0.710692	1.72335e-16
cg06755448	3.06371e-12	Body	ZNF276	shelf	16	ZNF276	-0.537027	1.00161e-08
cg17075096	3.14526e-12	5'UTR	FAM24B	opensea	10	FAM24B	0.646744	4.78075e-13
cg08877257	3.16438e-12	Body	MAZ	shore	16	MAZ	-0.522506	2.89993e-08
cg26818464	3.33014e-12	5'UTR	PRKCQ	shelf	10	PRKCQ	-0.639638	1.02916e-12
cg10357909	3.35605e-12	Body	RAB11FIP3	shelf	16	RAB11FIP3	0.551673	3.25387e-09
cg16532400	3.36015e-12	5'UTR	GIMAP7	opensea	7	GIMAP7	-0.711946	1.44394e-16
cg16001613	3.43227e-12	TSS1500	CD5	opensea	11	CD5	-0.79576	7.53422e-23
cg10315334	3.68095e-12	1stExon	CCL5	opensea	17	CCL5	-0.704522	4.05861e-16
cg07661835	3.83752e-12	Body	ACSF3	shelf	16	ACSF3	-0.539032	8.61483e-09
cg26861995	3.86184e-12	Body	RUVBL1	opensea	3	RUVBL1	-0.793834	1.13017e-22
cg27316811	3.97585e-12	Body	IFT140	shore	16	IFT140	-0.758811	9.15374e-20
cg06517940	4.31392e-12	5'UTR	LCK	shelf	1	LCK	-0.783409	9.43935e-22
cg10151085	4.38304e-12	TSS1500	CBX5	opensea	12	CBX5	0.603867	3.67369e-11
cg04951104	4.49243e-12	TSS1500	MEOX1	opensea	17	MEOX1	-0.560326	1.63177e-09
cg03896542	4.69833e-12	Body	GNAO1	opensea	16	GNAO1	-0.613817	1.42173e-11
cg25839227	4.72286e-12	Body	ABI3	opensea	17	ABI3	-0.542126	6.81302e-09
cg14165142	4.78181e-12	Body	CDC25B	shore	20	CDC25B	-0.835455	5.82089e-27
cg26163153	4.81685e-12	TSS1500	RHOH	opensea	4	RHOH	-0.833315	1.03217e-26
cg13364311	4.87501e-12	Body	EPHA4	opensea	2	EPHA4	0.503004	1.12051e-07
cg23012294	4.90416e-12	Body	ZNF416	shelf	19	ZNF416	0.530766	1.59379e-08
cg17158941	4.93721e-12	Body	C7orf50	shelf	7	C7orf50	-0.512576	5.83291e-08
cg00501919	4.94886e-12	Body	LTA	opensea	6	LTA	-0.676469	1.5355e-14
cg21761853	5.14692e-12	Body	FLOT1	opensea	6	FLOT1	0.652931	2.41197e-13
cg13573582	5.35906e-12	Body	RNF220	shelf	1	RNF220	0.689427	3.01662e-15
cg26934362	5.41398e-12	Body	LPCAT1	shelf	5	LPCAT1	-0.520392	3.37149e-08
cg03000848	5.80487e-12	Body	AXIN1	opensea	16	AXIN1	-0.593946	9.16774e-11
cg05350315	5.82844e-12	5'UTR	LCK	shelf	1	LCK	-0.617721	9.70642e-12
cg12800105	5.9144e-12	Body	KDM2B	shelf	12	KDM2B	-0.731123	8.54932e-18
cg05103064	6.01358e-12	Body	SFMBT2	opensea	10	SFMBT2	-0.608001	2.48618e-11
cg19528654	6.05857e-12	Body	AIP	shore	11	AIP	-0.623965	5.21416e-12
cg26341831	6.1236e-12	Body	TMEM63A	opensea	1	TMEM63A	-0.522425	2.9169e-08
cg07786657	6.25598e-12	Body	CD247	opensea	1	CD247	-0.87618	1.65076e-32
cg06143615	6.43559e-12	TSS1500	NUP210	shore	3	NUP210	-0.570586	7.0138e-10
cg16909914	6.65721e-12	5'UTR	ANKRD46	opensea	8	ANKRD46	-0.555181	2.46556e-09
cg02431562	6.92881e-12	Body	DUSP2	shore	2	DUSP2	-0.664691	6.28341e-14
cg07026010	7.49048e-12	Body	NUDCD3	opensea	7	NUDCD3	-0.635404	1.60997e-12
cg21103992	7.64758e-12	Body	MICAL3	shore	22	MICAL3	-0.597202	6.81439e-11
cg27430637	7.87177e-12	3'UTR	CD52	opensea	1	CD52	-0.721363	3.71102e-17
cg02427831	8.07301e-12	TSS1500	SIGLEC8	opensea	19	SIGLEC8	-0.526594	2.1608e-08
cg04131610	8.12399e-12	TSS200	CCR5	opensea	3	CCR5	-0.687002	4.11671e-15
cg07569288	8.22794e-12	Body	RPS11	shelf	19	RPS11	-0.727557	1.47252e-17
cg17587997	8.61907e-12	5'UTR	FYN	opensea	6	FYN	-0.702515	5.33755e-16
cg22898082	9.03869e-12	5'UTR	SMARCA4	shelf	19	SMARCA4	-0.508512	7.71517e-08
cg21876656	9.0786e-12	Body	UBAC2	opensea	13	UBAC2	-0.510845	6.57361e-08
cg16408081	9.12064e-12	Body	CORO1B	shelf	11	PTPRCAP	-0.551807	3.21979e-09
cg20309891	9.22914e-12	TSS200	MEOX1	opensea	17	MEOX1	-0.614721	1.3021e-11
cg12011479	9.22914e-12	TSS1500	CLDND2	shore	19	CLDND2	-0.607313	2.65422e-11
cg20516845	9.38687e-12	TSS1500	UBASH3A	opensea	21	UBASH3A	-0.84181	1.01153e-27
cg26736341	9.44018e-12	3'UTR	TNF	shelf	6	TNF	-0.583455	2.33237e-10
cg01605984	9.46661e-12	TSS200	SNORD24	shore	9	MED22	-0.51008	6.92872e-08
cg01605984	9.46661e-12	TSS200	SNORD24	shore	9	RPL7A	-0.623498	5.46501e-12
cg12111137	1.04741e-11	Body	TBCD	opensea	17	TBCD	-0.691264	2.37887e-15
cg16541275	1.05468e-11	Body	RPTOR	shelf	17	RPTOR	-0.668305	4.10539e-14
cg02131853	1.07009e-11	TSS1500	TMEM156	opensea	4	TMEM156	-0.623992	5.19983e-12
cg00175153	1.08693e-11	TSS1500	SNORA10	shore	16	RPS2	-0.552547	3.03735e-09
cg08782899	1.09938e-11	TSS1500	ARL16	shore	17	ARL16	-0.637194	1.3336e-12
cg02787852	1.10006e-11	1stExon	IL21R	opensea	16	IL21R	-0.860587	3.53096e-30
cg16806041	1.12978e-11	Body	FHIT	opensea	3	FHIT	-0.537707	9.51819e-09
cg01500140	1.23001e-11	Body	LIM2	opensea	19	LIM2	-0.560422	1.61916e-09
cg15128876	1.26446e-11	5'UTR	B4GALT3	shore	1	B4GALT3	-0.538261	9.12983e-09
cg12044599	1.34964e-11	Body	CORO1B	shelf	11	PTPRCAP	-0.537291	9.81988e-09
cg13603599	1.35529e-11	Body	AIP	shore	11	AIP	-0.63898	1.10375e-12
cg11218434	1.36556e-11	TSS200	SNORA31	shelf	13	TPT1	-0.608694	2.32744e-11
cg25140783	1.36576e-11	3'UTR	RCAN3	island	1	RCAN3	-0.762363	4.89372e-20
cg16456087	1.38921e-11	Body	OXNAD1	opensea	3	OXNAD1	-0.643906	6.50925e-13
cg01974478	1.39291e-11	Body	FOXK1	opensea	7	FOXK1	-0.583817	2.2595e-10
cg19747992	1.4308e-11	TSS1500	FBXO44	shore	1	FBXO44	0.537735	9.49833e-09
cg12415479	1.4308e-11	Body	PLXND1	opensea	3	PLXND1	0.517389	4.16872e-08
cg08036492	1.44432e-11	Body	COX10	shelf	17	COX10	0.674209	2.02228e-14
cg14505439	1.45483e-11	Body	RAPGEF1	opensea	9	RAPGEF1	-0.54117	7.32718e-09
cg00344801	1.47759e-11	Body	TTC38	island	22	TTC38	-0.634282	1.81057e-12
cg03234557	1.58222e-11	Body	TSPAN5	opensea	4	TSPAN5	-0.543047	6.35078e-09
cg22512531	1.59554e-11	Body	CRTAM	opensea	11	CRTAM	-0.701837	5.85226e-16
cg06164961	1.60421e-11	Body	CD3E	opensea	11	CD3E	-0.870374	1.31969e-31
cg08859278	1.60898e-11	TSS1500	ZAP70	opensea	2	ZAP70	-0.69674	1.15938e-15
cg10877430	1.62893e-11	Body	DTX1	shelf	12	DTX1	-0.671249	2.89e-14
cg04494197	1.64375e-11	3'UTR	AP2A2	shore	11	AP2A2	0.54988	3.74498e-09
cg01525376	1.65731e-11	TSS1500	LCK	shelf	1	LCK	-0.555028	2.49569e-09
cg05401069	1.70427e-11	TSS200	TTC39C	opensea	18	TTC39C	-0.7301	1.00024e-17
cg23114435	1.75405e-11	Body	CD247	opensea	1	CD247	-0.840658	1.39729e-27
cg25522181	1.75728e-11	Body	CIAO1	shore	2	CIAO1	-0.512515	5.85776e-08
cg23797615	1.80885e-11	3'UTR	CLCF1	opensea	11	CLCF1	-0.659982	1.08455e-13
cg15989608	1.81348e-11	3'UTR	TNF	shelf	6	TNF	-0.574483	5.05039e-10
cg25508633	1.82844e-11	TSS200	SNORD105	shore	19	PPAN	-0.718019	6.05026e-17
cg21265072	1.91994e-11	Body	RNF157	opensea	17	RNF157	0.604149	3.57783e-11
cg12639429	1.95103e-11	TSS200	TTC39C	opensea	18	TTC39C	-0.819795	3.21677e-25
cg07728874	2.04075e-11	1stExon	CD3D	opensea	11	CD3D	-0.874633	2.90113e-32
cg06217769	2.051e-11	Body	SMG6	opensea	17	SMG6	-0.721917	3.42e-17
cg09826895	2.09877e-11	TSS1500	DENND2D	shelf	1	DENND2D	-0.642192	7.83085e-13
cg19456938	2.19603e-11	TSS200	TIGIT	opensea	3	TIGIT	-0.774684	5.10787e-21
cg02115302	2.29068e-11	Body	NSMCE1	opensea	16	NSMCE1	-0.617243	1.01744e-11
cg27051683	2.29305e-11	TSS1500	PDCD1	shelf	2	PDCD1	-0.597096	6.8805e-11
cg01439631	2.35596e-11	Body	SCLY	shelf	2	SCLY	-0.666339	5.17913e-14
cg02190353	2.46748e-11	Body	SLC25A37	opensea	8	SLC25A37	-0.564156	1.19458e-09
cg23825480	2.48181e-11	Body	MORC2	opensea	22	MORC2	-0.820599	2.64303e-25
cg07015803	2.5144e-11	Body	BCL11B	opensea	14	BCL11B	-0.824118	1.10584e-25
cg20169988	2.60347e-11	Body	S100A9	opensea	1	S100A9	-0.639636	1.0294e-12
cg23468927	2.64666e-11	Body	CORO1B	shelf	11	PTPRCAP	-0.58026	3.0793e-10
cg27553947	2.7495e-11	Body	CLSTN1	shelf	1	CLSTN1	0.726075	1.84125e-17
cg12353788	2.7985e-11	Body	CHD3	shelf	17	CHD3	-0.676174	1.59197e-14
cg05343021	2.82222e-11	5'UTR	ILF3	opensea	19	ILF3	-0.508281	7.83784e-08
cg00682487	2.85155e-11	5'UTR	DTHD1	opensea	4	DTHD1	-0.510473	6.74435e-08
cg05352838	2.88321e-11	3'UTR	CUTA	shore	6	CUTA	-0.659202	1.18601e-13
cg15055101	2.8988e-11	5'UTR	SH2D3A	shore	19	SH2D3A	-0.65113	2.94822e-13
cg01550799	2.9998e-11	TSS1500	MDFIC	shore	7	MDFIC	-0.604314	3.52271e-11
cg03961551	3.02068e-11	Body	RUNX3	shelf	1	RUNX3	-0.617271	1.01463e-11
cg23346237	3.07307e-11	Body	TTC38	island	22	TTC38	-0.547822	4.39611e-09
cg12832565	3.1054e-11	TSS200	CD160	shore	1	CD160	-0.570803	6.88746e-10
cg07418892	3.12601e-11	TSS1500	MCM3	shore	6	MCM3	-0.718929	5.30031e-17
cg17254386	3.14817e-11	Body	MCCC2	opensea	5	MCCC2	-0.655714	1.76377e-13
cg02586198	3.18204e-11	Body	MAZ	shore	16	MAZ	-0.533739	1.27986e-08
cg25298161	3.233e-11	TSS200	LTK	shore	15	LTK	0.512215	5.98068e-08
cg16681526	3.34417e-11	TSS1500	TNFRSF25	shore	1	TNFRSF25	-0.555455	2.41235e-09
cg04005059	3.40009e-11	5'UTR	KLHL29	opensea	2	KLHL29	0.560219	1.64593e-09
cg24057642	3.418e-11	TSS1500	NR2F6	shore	19	NR2F6	0.517072	4.26271e-08
cg16578549	3.54413e-11	5'UTR	CTNNBIP1	opensea	1	CTNNBIP1	0.501035	1.27846e-07
cg06219806	3.56956e-11	5'UTR	AHNAK	opensea	11	AHNAK	-0.662341	8.2609e-14
cg10206933	3.65158e-11	Body	BNIP3	opensea	10	BNIP3	-0.65693	1.53681e-13
cg11439695	3.67809e-11	Body	CACNA1C	opensea	12	CACNA1C	-0.531143	1.55026e-08
cg22108563	3.69884e-11	TSS200	DOK3	opensea	5	DOK3	-0.598362	6.12564e-11
cg23500396	3.9131e-11	5'UTR	TSPAN18	opensea	11	TSPAN18	0.544942	5.49212e-09
cg19620383	3.93517e-11	Body	RORA	opensea	15	RORA	-0.57001	7.3599e-10
cg13408605	3.9456e-11	TSS1500	SIRPG	opensea	20	SIRPG	-0.739259	2.39284e-18
cg17813891	4.01338e-11	Body	EVL	opensea	14	EVL	-0.795915	7.29039e-23
cg01104425	4.09888e-11	Body	RUNX3	opensea	1	RUNX3	-0.538375	9.05164e-09
cg20288927	4.10909e-11	Body	RUNX3	opensea	1	RUNX3	-0.661464	9.14284e-14
cg03293732	4.12917e-11	Body	IKZF3	shelf	17	IKZF3	-0.79016	2.42092e-22
cg03547581	4.14608e-11	3'UTR	NUCKS1	opensea	1	NUCKS1	0.713093	1.22735e-16
cg17078393	4.17988e-11	5'UTR	LCK	shelf	1	LCK	-0.809607	3.57133e-24
cg15306060	4.39746e-11	Body	RPL3	shelf	22	RPL3	-0.720244	4.37388e-17
cg23364656	4.42428e-11	TSS200	PRF1	shelf	10	PRF1	-0.539484	8.32537e-09
cg02836135	4.42879e-11	Body	SCML4	opensea	6	SCML4	-0.697069	1.1097e-15
cg26724841	4.45667e-11	5'UTR	RNF216	shelf	7	RNF216	-0.590976	1.19828e-10
cg13423554	4.47297e-11	5'UTR	HIVEP3	opensea	1	HIVEP3	0.698964	8.6186e-16
cg16519923	4.49534e-11	Body	ITGAL	shore	16	ITGAL	-0.514423	5.13057e-08
cg09571972	4.57074e-11	Body	GMDS	opensea	6	GMDS	0.609702	2.11385e-11
cg15350899	4.5929e-11	TSS200	BCL9L	shore	11	BCL9L	-0.593471	9.57087e-11
cg11733958	4.60354e-11	Body	MPRIP	opensea	17	MPRIP	-0.689881	2.8453e-15
cg16235962	4.60385e-11	TSS200	CXCR5	opensea	11	CXCR5	-0.727211	1.55164e-17
cg16015295	4.62636e-11	Body	RPTOR	shelf	17	RPTOR	0.530366	1.64133e-08
cg13531460	4.79125e-11	TSS1500	GPR55	opensea	2	GPR55	-0.720601	4.1508e-17
cg15519096	4.82181e-11	5'UTR	RCAN3	shelf	1	RCAN3	-0.718386	5.73676e-17
cg10111816	4.92369e-11	Body	CDR2	shore	16	CDR2	-0.653985	2.14312e-13
cg02580626	4.97625e-11	3'UTR	PEX26	opensea	22	PEX26	-0.508537	7.70172e-08
cg26689077	4.99594e-11	5'UTR	ITGB7	opensea	12	ITGB7	-0.617039	1.03803e-11
cg08544331	5.00523e-11	Body	RUNX3	opensea	1	RUNX3	-0.804714	1.07847e-23
cg14506192	5.06435e-11	Body	DIABLO	shore	12	DIABLO	-0.738446	2.72329e-18
cg00417692	5.09073e-11	3'UTR	CAMK2D	opensea	4	CAMK2D	0.513819	5.35101e-08
cg17848003	5.14711e-11	Body	LRRC47	shore	1	LRRC47	-0.634875	1.7017e-12
cg04392554	5.22611e-11	Body	TTC38	island	22	TTC38	-0.693952	1.6749e-15
cg00945209	5.53099e-11	Body	USP36	shelf	17	USP36	-0.767218	2.04247e-20
cg20995188	5.53176e-11	Body	UXS1	opensea	2	UXS1	-0.59052	1.24817e-10
cg27545630	5.53627e-11	Body	SNORA64	shore	16	RPS2	-0.617244	1.01731e-11
cg10161121	5.59544e-11	TSS200	FASLG	opensea	1	FASLG	-0.671999	2.64116e-14
cg18436788	5.63331e-11	Body	LRRC47	shore	1	LRRC47	-0.711718	1.49132e-16
cg09362796	5.67565e-11	Body	HTT	opensea	4	HTT	-0.513731	5.38367e-08
cg18719665	5.8371e-11	TSS200	TTC39C	opensea	18	TTC39C	-0.828733	3.42415e-26
cg07813265	5.83943e-11	Body	CDC14A	shore	1	CDC14A	-0.509868	7.03051e-08
cg16350446	6.25059e-11	Body	DCAF17	opensea	2	DCAF17	0.569027	7.98847e-10
cg27088822	6.39009e-11	5'UTR	CAMKK2	shelf	12	CAMKK2	-0.518456	3.86686e-08
cg11205006	6.52046e-11	1stExon	HPS4	shelf	22	HPS4	0.589434	1.37551e-10
cg08471335	6.62526e-11	Body	TTC38	island	22	TTC38	-0.676877	1.46061e-14
cg25436766	6.62618e-11	Body	UXS1	opensea	2	UXS1	-0.522377	2.92683e-08
cg01522592	6.63338e-11	5'UTR	GDPD5	shore	11	GDPD5	-0.694917	1.47544e-15
cg23200218	6.63606e-11	Body	RYR1	shore	19	RYR1	-0.619136	8.44173e-12
cg15293582	6.73462e-11	TSS1500	PRF1	shelf	10	PRF1	-0.738333	2.77252e-18
cg26733897	6.74741e-11	Body	RPTOR	opensea	17	RPTOR	-0.607684	2.56246e-11
cg18447402	6.85563e-11	Body	MRPS33	opensea	7	MRPS33	-0.610981	1.86978e-11
cg07385573	6.99596e-11	Body	USP36	shelf	17	USP36	-0.730866	8.89419e-18
cg20997320	7.01701e-11	Body	PCNT	island	21	PCNT	-0.715022	9.32067e-17
cg03254534	7.10845e-11	Body	MALT1	shelf	18	MALT1	-0.516575	4.41394e-08
cg23514374	7.23102e-11	Body	ETS1	opensea	11	ETS1	-0.721098	3.85908e-17
cg02566391	7.31758e-11	Body	IL12RB2	opensea	1	IL12RB2	-0.660288	1.04708e-13
cg25941285	7.51147e-11	Body	RORA	opensea	15	RORA	0.600796	4.89236e-11
cg24441810	7.62121e-11	TSS1500	TMEM177	shore	2	TMEM177	-0.722996	2.91577e-17
cg02737268	7.79177e-11	Body	CDC25B	shelf	20	CDC25B	-0.795919	7.28419e-23
cg10244976	7.88272e-11	Body	LMF1	island	16	LMF1	-0.710926	1.66759e-16
cg14614490	7.92448e-11	5'UTR	PHF19	shore	9	PHF19	-0.60709	2.71093e-11
cg24612198	7.9613e-11	5'UTR	CD3E	opensea	11	CD3E	-0.870405	1.3053e-31
cg04168675	8.10928e-11	Body	DOCK10	opensea	2	DOCK10	-0.649224	3.64101e-13
cg20805133	8.13821e-11	TSS1500	PDCD1	shelf	2	PDCD1	-0.612965	1.54407e-11
cg10506318	8.21054e-11	Body	ERCC8	shore	5	NDUFAF2	0.710939	1.66451e-16
cg24503369	8.23929e-11	Body	SLC8A1	opensea	2	SLC8A1	0.516564	4.41753e-08
cg17310882	8.46043e-11	Body	ZDHHC14	opensea	6	ZDHHC14	0.683646	6.29961e-15
cg06567290	8.65657e-11	5'UTR	SLC37A4	shore	11	SLC37A4	0.707374	2.73925e-16
cg05380759	8.67229e-11	Body	LARS2	opensea	3	LARS2	0.636151	1.48856e-12
cg24542714	8.91759e-11	Body	POMGNT1	shore	1	POMGNT1	0.770194	1.18289e-20
cg19927816	8.9241e-11	Body	SYMPK	island	19	SYMPK	0.569048	7.97484e-10
cg19266387	8.9278e-11	Body	PARL	opensea	3	PARL	0.622703	5.91839e-12
cg25066857	9.15647e-11	5'UTR	GNLY	opensea	2	GNLY	-0.694366	1.5863e-15
cg27578381	9.36199e-11	Body	USP36	opensea	17	USP36	-0.560319	1.63272e-09
cg07630255	9.56285e-11	Body	MPI	shelf	15	MPI	-0.794379	1.00799e-22
cg20901032	9.62689e-11	TSS1500	CSNK1A1L	opensea	13	CSNK1A1L	0.532991	1.35279e-08
cg05755408	9.6573e-11	Body	TRIM35	opensea	8	TRIM35	0.664525	6.40672e-14
cg17169196	9.89567e-11	TSS200	LTA	opensea	6	LTA	-0.747819	5.94799e-19
cg02561912	1.02975e-10	Body	NFATC2	shore	20	NFATC2	-0.533856	1.26882e-08
cg02927682	1.03312e-10	Body	SSBP3	opensea	1	SSBP3	0.782889	1.04609e-21
cg13361023	1.03604e-10	Body	ATP10A	shelf	15	ATP10A	-0.674653	1.91613e-14
cg03065503	1.07118e-10	Body	STX18	opensea	4	STX18	-0.619342	8.27168e-12
cg14306819	1.16066e-10	TSS1500	ERCC3	shore	2	ERCC3	0.595734	7.79295e-11
cg17184477	1.18015e-10	Body	SMAD3	shore	15	SMAD3	-0.650408	3.19438e-13
cg22641280	1.19157e-10	Body	TOX	shelf	8	TOX	-0.672293	2.54918e-14
cg23275644	1.19538e-10	Body	ROPN1L	opensea	5	ROPN1L	-0.672426	2.50885e-14
cg25429672	1.19722e-10	5'UTR	UCP2	shore	11	UCP2	-0.675308	1.76926e-14
cg07760161	1.21935e-10	5'UTR	TP53	shore	17	TP53	-0.675938	1.63853e-14
cg07760161	1.21935e-10	5'UTR	TP53	shore	17	WRAP53	-0.738074	2.88862e-18
cg25259754	1.22829e-10	Body	FCRL3	opensea	1	FCRL3	-0.616231	1.12352e-11
cg01566584	1.22957e-10	Body	TRMU	shore	22	TRMU	-0.563809	1.22904e-09
cg13651908	1.25424e-10	TSS1500	CD28	opensea	2	CD28	-0.770102	1.20318e-20
cg26126806	1.27173e-10	5'UTR	RAI1	island	17	RAI1	0.679193	1.09809e-14
cg00336376	1.27248e-10	Body	ZNF831	shore	20	ZNF831	0.791853	1.70749e-22
cg10977115	1.27931e-10	Body	CRTAM	opensea	11	CRTAM	-0.725549	1.99249e-17
cg16391678	1.28292e-10	Body	ITGAL	island	16	ITGAL	-0.511876	6.12246e-08
cg02600394	1.28352e-10	5'UTR	TXK	opensea	4	TXK	-0.700503	7.00854e-16
cg26757673	1.3016e-10	5'UTR	IL2RB	opensea	22	IL2RB	-0.724278	2.40958e-17
cg20759281	1.3054e-10	Body	LDHB	opensea	12	LDHB	0.791724	1.75348e-22
cg13669740	1.31413e-10	5'UTR	TIGIT	opensea	3	TIGIT	-0.759766	7.74313e-20
cg03016153	1.31533e-10	TSS200	CD2	opensea	1	CD2	-0.782672	1.09185e-21
cg04593538	1.32874e-10	TSS1500	MEOX1	opensea	17	MEOX1	-0.663084	7.57833e-14
cg23114183	1.33071e-10	Body	RORC	opensea	1	RORC	-0.606592	2.84204e-11
cg06512263	1.35059e-10	Body	CDKAL1	opensea	6	CDKAL1	0.542315	6.7159e-09
cg12182708	1.35702e-10	Body	MMS19	opensea	10	MMS19	0.735516	4.32384e-18
cg10511902	1.36685e-10	Body	CCDC88C	opensea	14	CCDC88C	-0.6308	2.59862e-12
cg20417024	1.37819e-10	Body	F2R	opensea	5	F2R	-0.554933	2.51469e-09
cg03523538	1.3985e-10	Body	MAZ	shore	16	MAZ	-0.564885	1.12525e-09
cg03995533	1.40219e-10	Body	CLEC16A	opensea	16	CLEC16A	-0.547026	4.67591e-09
cg24841244	1.42435e-10	5'UTR	CD3D	opensea	11	CD3D	-0.831731	1.56874e-26
cg04371413	1.44794e-10	Body	ADAM23	opensea	2	ADAM23	-0.546249	4.96552e-09
cg13458384	1.45518e-10	Body	SARDH	shore	9	SARDH	-0.679943	1.00076e-14
cg01042641	1.45785e-10	Body	IFT140	shore	16	IFT140	-0.665148	5.95637e-14
cg15041658	1.49685e-10	Body	OSBPL3	opensea	7	OSBPL3	-0.60977	2.10011e-11
cg13580827	1.52154e-10	Body	APBA1	opensea	9	APBA1	-0.513676	5.40423e-08
cg00090787	1.52313e-10	Body	RPL4	opensea	15	RPL4	-0.603743	3.71677e-11
cg15928742	1.53338e-10	3'UTR	GORASP2	opensea	2	GORASP2	0.519352	3.62963e-08
cg04712122	1.53922e-10	Body	BCL11B	opensea	14	BCL11B	-0.799625	3.29521e-23
cg09920804	1.57263e-10	5'UTR	PLAT	opensea	8	PLAT	-0.648179	4.08513e-13
cg00293189	1.63356e-10	5'UTR	RPL39L	shore	3	RPL39L	-0.617651	9.77349e-12
cg01167556	1.66246e-10	TSS1500	DGKA	shelf	12	DGKA	-0.529022	1.81096e-08
cg22241838	1.66332e-10	TSS1500	TMEM109	shore	11	TMEM109	-0.662383	8.22106e-14
cg24310395	1.6751e-10	Body	CX3CR1	opensea	3	CX3CR1	-0.554268	2.65094e-09
cg05377120	1.70409e-10	TSS200	KLRD1	opensea	12	KLRD1	-0.634996	1.68033e-12
cg15101008	1.72708e-10	Body	WDR46	shelf	6	WDR46	0.631322	2.46247e-12
cg19376461	1.77216e-10	Body	IMMP2L	opensea	7	IMMP2L	0.604155	3.57595e-11
cg02315870	1.79127e-10	Body	HNRNPA2B1	shelf	7	HNRNPA2B1	-0.549619	3.82217e-09
cg07679948	1.79725e-10	5'UTR	DGKA	island	12	DGKA	-0.812988	1.63295e-24
cg01165817	1.81572e-10	Body	PCCA	opensea	13	PCCA	-0.652226	2.60966e-13
cg01400040	1.81792e-10	Body	RORA	opensea	15	RORA	-0.71185	1.46368e-16
cg11667301	1.85712e-10	Body	SNORD70	opensea	2	NOP58	-0.511401	6.32666e-08
cg24620635	1.88141e-10	Body	GNLY	opensea	2	GNLY	-0.651534	2.81882e-13
cg26484813	1.8937e-10	5'UTR	AHNAK	shore	11	AHNAK	-0.501907	1.20608e-07
cg12910851	1.89768e-10	1stExon	IL1R2	opensea	2	IL1R2	0.55227	3.10456e-09
cg16789764	1.90526e-10	Body	ZC3H14	opensea	14	ZC3H14	-0.634251	1.81644e-12
cg11133963	1.90583e-10	Body	ABI3	shore	17	ABI3	-0.630884	2.57639e-12
cg26472802	1.90779e-10	Body	AIRE	island	21	AIRE	-0.548374	4.21156e-09
cg25189764	1.91196e-10	5'UTR	FYN	opensea	6	FYN	-0.763909	3.71355e-20
cg00980904	1.94167e-10	Body	RASSF1	shore	3	RASSF1	-0.763315	4.12999e-20
cg16936094	1.95438e-10	Body	NMT2	opensea	10	NMT2	-0.762734	4.58097e-20
cg20267828	1.99257e-10	5'UTR	THEMIS	opensea	6	THEMIS	-0.661838	8.75648e-14
cg10913077	2.0337e-10	5'UTR	ARHGEF3	opensea	3	ARHGEF3	-0.590759	1.22178e-10
cg25260426	2.03639e-10	Body	LHPP	opensea	10	LHPP	0.573266	5.59818e-10
cg08130912	2.0476e-10	Body	SYNE2	opensea	14	SYNE2	0.679749	1.02505e-14
cg22217449	2.07488e-10	Body	PCNT	island	21	PCNT	-0.781872	1.27815e-21
cg13750061	2.0767e-10	TSS1500	CD3G	opensea	11	CD3G	-0.736062	3.96886e-18
cg13750061	2.0767e-10	TSS1500	CD3G	opensea	11	CD3D	-0.749401	4.57101e-19
cg10759927	2.08235e-10	TSS1500	TCEA2	shore	20	TCEA2	0.635172	1.64961e-12
cg00902815	2.10127e-10	Body	LMO7	opensea	13	LMO7	-0.575711	4.54989e-10
cg23112188	2.10547e-10	TSS1500	PCK2	shore	14	PCK2	0.586133	1.84347e-10
cg03727968	2.10896e-10	Body	CD247	opensea	1	CD247	-0.779221	2.14309e-21
cg26056577	2.13169e-10	TSS1500	TNFRSF25	shore	1	TNFRSF25	-0.807266	6.08358e-24
cg26056577	2.13169e-10	TSS1500	TNFRSF25	shore	1	PLEKHG5	-0.729197	1.14809e-17
cg08450017	2.14843e-10	TSS200	CXCR6	opensea	3	CXCR6	-0.588008	1.56155e-10
cg08450017	2.14843e-10	TSS200	CXCR6	opensea	3	FYCO1	-0.538444	9.00523e-09
cg27111890	2.15206e-10	TSS1500	UBASH3A	opensea	21	UBASH3A	-0.770556	1.10607e-20
cg26689186	2.22899e-10	Body	BBS9	opensea	7	BBS9	-0.584966	2.04301e-10
cg01894064	2.23465e-10	TSS1500	TRIM2	shore	4	TRIM2	0.64507	5.73748e-13
cg06983746	2.23989e-10	TSS200	FASLG	opensea	1	FASLG	-0.661205	9.42035e-14
cg14437551	2.2403e-10	TSS200	LTA	opensea	6	LTA	-0.741472	1.67834e-18
cg08764162	2.2753e-10	Body	ZNF438	opensea	10	ZNF438	-0.507528	8.25085e-08
cg22529645	2.29203e-10	Body	LRRC47	shore	1	LRRC47	-0.619673	8.00459e-12
cg17541002	2.32064e-10	5'UTR	CAMKK2	shelf	12	CAMKK2	-0.611625	1.75743e-11
cg04340595	2.38657e-10	3'UTR	CLSTN1	shore	1	CLSTN1	-0.774416	5.37321e-21
cg15283373	2.38713e-10	TSS1500	DTX3	opensea	12	DTX3	0.600756	4.91027e-11
cg27321942	2.39256e-10	Body	RPL13AP5	shore	19	RPL13A	-0.649325	3.60065e-13
cg08796342	2.43558e-10	TSS200	TC2N	opensea	14	TC2N	-0.715843	8.28442e-17
cg27644327	2.4588e-10	5'UTR	BACH2	opensea	6	BACH2	0.715047	9.28675e-17
cg19468528	2.57047e-10	TSS1500	LOC100130933	opensea	17	RECQL5	0.643102	7.10001e-13
cg14586546	2.62271e-10	Body	RALGDS	opensea	9	RALGDS	-0.678832	1.14822e-14
cg21276056	2.66519e-10	Body	OLFM2	island	19	OLFM2	-0.644401	6.16993e-13
cg14597804	2.70418e-10	Body	RAD50	opensea	5	RAD50	-0.531385	1.52291e-08
cg08655071	2.70976e-10	TSS1500	TRAF3IP3	opensea	1	TRAF3IP3	-0.502482	1.16047e-07
cg04657000	2.72762e-10	5'UTR	FYN	opensea	6	FYN	-0.677718	1.31734e-14
cg20239639	2.72824e-10	5'UTR	LCK	shore	1	LCK	-0.680677	9.13454e-15
cg10056728	2.78816e-10	TSS1500	PA2G4	shore	12	PA2G4	-0.70412	4.28832e-16
cg16529592	2.80299e-10	TSS1500	RUNX3	opensea	1	RUNX3	-0.674997	1.83758e-14
cg04951476	2.83316e-10	TSS1500	FAM50B	shore	6	FAM50B	-0.608179	2.44449e-11
cg07545925	2.96227e-10	TSS200	CD3G	opensea	11	CD3G	-0.811354	2.38808e-24
cg07545925	2.96227e-10	TSS200	CD3G	opensea	11	CD3D	-0.832473	1.29006e-26
cg25711246	2.97472e-10	TSS1500	KCNA6	shore	12	KCNA6	-0.697962	9.85335e-16
cg27571769	3.00088e-10	Body	ACSL1	opensea	4	ACSL1	-0.521146	3.19544e-08
cg01150799	3.00845e-10	3'UTR	HADH	opensea	4	HADH	-0.551407	3.32258e-09
cg18404652	3.05959e-10	TSS1500	AP3M2	shore	8	AP3M2	-0.592901	1.00763e-10
cg20017995	3.09487e-10	TSS200	SNORD24	shore	9	RPL7A	-0.683837	6.15014e-15
cg07212384	3.15106e-10	Body	GAL3ST4	opensea	7	GAL3ST4	-0.59559	7.89534e-11
cg23025223	3.17535e-10	TSS1500	ROPN1L	shore	5	ROPN1L	-0.603698	3.73236e-11
cg13247398	3.17971e-10	TSS200	DGKZ	shore	11	DGKZ	0.587593	1.62012e-10
cg02650512	3.19535e-10	Body	RPL23A	shore	17	RPL23A	-0.680644	9.17201e-15
cg11399589	3.20432e-10	Body	BLCAP	shore	20	BLCAP	0.598553	6.01914e-11
cg11852794	3.21602e-10	TSS1500	CATSPERB	opensea	14	CATSPERB	-0.521414	3.13511e-08
cg21139587	3.24387e-10	Body	CSRP1	opensea	1	CSRP1	0.573793	5.35422e-10
cg21012139	3.40721e-10	Body	PLEKHG5	shelf	1	PLEKHG5	-0.750864	3.57653e-19
cg09354050	3.41683e-10	Body	UBASH3A	opensea	21	UBASH3A	-0.832886	1.15641e-26
cg17949727	3.4539e-10	5'UTR	INPP5B	opensea	1	INPP5B	0.614338	1.35157e-11
cg04312209	3.4647e-10	1stExon	IL7R	opensea	5	IL7R	-0.597384	6.70137e-11
cg11683242	3.46804e-10	TSS1500	LCK	shelf	1	LCK	-0.875961	1.78856e-32
cg01616956	3.48086e-10	Body	NMUR1	shore	2	NMUR1	-0.824594	9.81448e-26
cg15797314	3.48547e-10	Body	PITPNC1	opensea	17	PITPNC1	-0.532279	1.42585e-08
cg24760467	3.51824e-10	5'UTR	LZTS2	shore	10	LZTS2	0.688515	3.39228e-15
cg18310515	3.61191e-10	5'UTR	GNLY	opensea	2	GNLY	-0.746223	7.74242e-19
cg01595717	3.62955e-10	Body	EHMT1	shore	9	EHMT1	0.519017	3.71667e-08
cg03074244	3.68721e-10	5'UTR	CD3D	opensea	11	CD3D	-0.738383	2.75037e-18
cg04403423	3.82406e-10	Body	ATP1A1	shore	1	ATP1A1	-0.62313	5.67066e-12
cg06430465	3.82655e-10	Body	LMF1	island	16	LMF1	-0.692582	2.00385e-15
cg00045515	3.84614e-10	Body	RBL1	shore	20	RBL1	-0.637246	1.32632e-12
cg17316030	3.8991e-10	Body	SYNE2	opensea	14	SYNE2	0.512766	5.75654e-08
cg21122693	3.94631e-10	Body	RNF4	opensea	4	RNF4	-0.533303	1.32192e-08
cg13554018	3.95627e-10	3'UTR	SPIN1	opensea	9	SPIN1	-0.507241	8.41372e-08
cg18461635	3.96317e-10	Body	CCDC12	opensea	3	CCDC12	-0.578559	3.56554e-10
cg01328500	3.98591e-10	Body	IQCG	opensea	3	IQCG	-0.598114	6.26694e-11
cg12897164	3.99301e-10	5'UTR	FBXO32	opensea	8	FBXO32	-0.650699	3.09283e-13
cg13681468	4.05389e-10	5'UTR	GPRIN3	shore	4	GPRIN3	-0.597952	6.36118e-11
cg01440934	4.09479e-10	Body	MKNK1	opensea	1	MKNK1	-0.501224	1.26245e-07
cg24662823	4.19219e-10	Body	ETS1	opensea	11	ETS1	-0.689697	2.9135e-15
cg26712743	4.23965e-10	Body	PYROXD2	opensea	10	PYROXD2	-0.646873	4.71385e-13
cg20055861	4.3083e-10	Body	MAP2K5	opensea	15	MAP2K5	-0.731894	7.59325e-18
cg04520704	4.35831e-10	Body	MICAL3	shore	22	MICAL3	-0.691718	2.2425e-15
cg14245199	4.51091e-10	Body	EVL	opensea	14	EVL	-0.731686	7.84094e-18
cg07627628	4.55464e-10	Body	DNMT1	shore	19	DNMT1	-0.59068	1.23048e-10
cg17036641	4.62385e-10	Body	GNL3	shelf	3	GNL3	-0.553445	2.82958e-09
cg19811994	4.62553e-10	Body	RASSF1	shore	3	RASSF1	-0.757294	1.19216e-19
cg24481882	4.63681e-10	Body	PDE7B	opensea	6	PDE7B	0.531537	1.506e-08
cg25316172	4.67421e-10	5'UTR	CYFIP2	shore	5	CYFIP2	-0.513464	5.48458e-08
cg01310029	4.67932e-10	TSS1500	IL5RA	opensea	3	IL5RA	-0.5457	5.18066e-09
cg24012880	4.77529e-10	5'UTR	TSPAN18	opensea	11	TSPAN18	0.676459	1.53733e-14
cg07658508	4.78731e-10	3'UTR	SLC26A1	opensea	4	SLC26A1	0.609587	2.13725e-11
cg16417028	4.85284e-10	1stExon	IL24	opensea	1	IL24	-0.715177	9.11558e-17
cg05257202	4.90913e-10	Body	UBAC2	opensea	13	UBAC2	-0.529603	1.73564e-08
cg15312943	4.97557e-10	Body	SERGEF	opensea	11	SERGEF	0.827028	5.30141e-26
cg22062539	5.0421e-10	Body	PTDSS1	opensea	8	PTDSS1	-0.558104	1.95184e-09
cg00038446	5.09326e-10	3'UTR	FASLG	opensea	1	FASLG	-0.716745	7.27587e-17
cg10373607	5.1722e-10	Body	TSHZ2	shelf	20	TSHZ2	-0.792766	1.41259e-22
cg26381210	5.25975e-10	5'UTR	BMPR1A	opensea	10	BMPR1A	0.686778	4.236e-15
cg01057573	5.30833e-10	Body	TNFAIP8	opensea	5	TNFAIP8	0.558394	1.90685e-09
cg03797115	5.31315e-10	TSS1500	CASP6	shore	4	CASP6	0.643685	6.66713e-13
cg03677056	5.3148e-10	Body	SLFN12L	shelf	17	SLFN12L	0.618892	8.64798e-12
cg01449715	5.4423e-10	Body	RNASEH2B	opensea	13	RNASEH2B	0.768093	1.74067e-20
cg21861305	5.4577e-10	TSS1500	CD2	opensea	1	CD2	-0.804568	1.11396e-23
cg06909254	5.47024e-10	Body	ST3GAL5	opensea	2	ST3GAL5	-0.635207	1.64355e-12
cg19421218	5.53053e-10	TSS200	TIGIT	opensea	3	TIGIT	-0.651853	2.72033e-13
cg17894779	5.5967e-10	Body	FHIT	opensea	3	FHIT	-0.693248	1.83672e-15
cg01492538	5.67797e-10	Body	GNA12	island	7	GNA12	0.624029	5.18055e-12
cg18128887	5.67941e-10	Body	RCAN3	island	1	RCAN3	-0.659296	1.17338e-13
cg27058497	5.74766e-10	TSS200	RUNX3	opensea	1	RUNX3	-0.667077	4.74731e-14
cg24082526	5.92259e-10	Body	RPL13AP5	shore	19	RPL13A	-0.579574	3.26718e-10
cg02082843	5.92855e-10	Body	FBLN5	opensea	14	FBLN5	-0.71073	1.71423e-16
cg04625873	6.0822e-10	TSS200	CXCR5	opensea	11	CXCR5	-0.775284	4.55905e-21
cg20789700	6.08553e-10	5'UTR	RBM47	opensea	4	RBM47	-0.539328	8.42405e-09
cg15167202	6.25586e-10	5'UTR	SYNPO	opensea	5	SYNPO	0.584561	2.11688e-10
cg26601310	6.29956e-10	5'UTR	PRR5L	shore	11	PRR5L	-0.509411	7.25437e-08
cg01008154	6.29958e-10	Body	PIK3R3	opensea	1	PIK3R3	0.675941	1.63779e-14
cg10061770	6.36497e-10	Body	PRMT7	opensea	16	PRMT7	0.838203	2.75706e-27
cg26692749	6.39725e-10	3'UTR	RCAN3	island	1	RCAN3	-0.727491	1.48748e-17
cg16393899	6.49403e-10	3'UTR	LYRM4	shore	6	LYRM4	0.783022	1.01911e-21
cg06813419	6.59905e-10	5'UTR	TRAF5	shore	1	TRAF5	-0.772619	7.53286e-21
cg25451120	6.68708e-10	TSS200	ABI3	opensea	17	GNGT2	-0.528693	1.85502e-08
cg06796611	6.89791e-10	1stExon	IL24	opensea	1	IL24	-0.70356	4.62922e-16
cg08786003	7.12689e-10	TSS200	FCRL3	opensea	1	FCRL3	-0.719805	4.6645e-17
cg15286847	7.27042e-10	Body	KLHL36	island	16	KLHL36	-0.595263	8.13423e-11
cg14290576	7.32757e-10	5'UTR	NFIL3	shore	9	NFIL3	-0.552873	2.96025e-09
cg10806146	7.42059e-10	5'UTR	SLC20A2	opensea	8	SLC20A2	0.709022	2.17776e-16
cg18338046	7.47871e-10	Body	TCF7	shore	5	TCF7	-0.745993	8.04215e-19
cg05637296	7.47902e-10	Body	TMC8	shore	17	TMC8	-0.705631	3.48534e-16
cg05637296	7.47902e-10	Body	TMC8	shore	17	TMC6	-0.674796	1.88318e-14
cg12198934	7.56016e-10	Body	PRKCA	opensea	17	PRKCA	-0.505374	9.55076e-08
cg01565438	7.59342e-10	TSS1500	SLFN13	island	17	SLFN13	0.571901	6.28089e-10
cg23366234	7.64835e-10	Body	AIRE	island	21	AIRE	-0.528457	1.88712e-08
cg21578596	7.79844e-10	Body	HLA-DMB	opensea	6	HLA-DMB	0.624096	5.14582e-12
cg02575483	7.90208e-10	Body	DCBLD1	opensea	6	DCBLD1	0.549448	3.87345e-09
cg15892497	8.08726e-10	TSS200	CD160	shore	1	CD160	-0.671101	2.94189e-14
cg21150901	8.12414e-10	TSS1500	MRM1	shore	17	MRM1	0.552929	2.94736e-09
cg12459932	8.14787e-10	TSS1500	RUNX3	opensea	1	RUNX3	-0.813303	1.51698e-24
cg21999229	8.15388e-10	TSS200	LTA	opensea	6	LTA	-0.696804	1.14946e-15
cg02150910	8.17731e-10	TSS1500	GZMH	opensea	14	GZMH	-0.651966	2.68633e-13
cg24113818	8.22724e-10	Body	RASA3	island	13	RASA3	-0.66521	5.91324e-14
cg10250177	8.29892e-10	5'UTR	LCK	shore	1	LCK	-0.529604	1.73549e-08
cg21854332	8.30518e-10	Body	PDE4DIP	opensea	1	PDE4DIP	0.655027	1.90608e-13
cg00803692	8.5387e-10	TSS200	CCR5	opensea	3	CCR5	-0.718335	5.77871e-17
cg15518113	8.56466e-10	3'UTR	CD247	opensea	1	CD247	-0.779206	2.14961e-21
cg15454110	8.70806e-10	3'UTR	CUTA	shore	6	CUTA	-0.661297	9.32157e-14
cg10450635	8.80914e-10	Body	SETD1A	shelf	16	SETD1A	0.511954	6.0894e-08
cg16918327	8.84962e-10	Body	RPTOR	opensea	17	RPTOR	-0.640031	9.86939e-13
cg13304638	9.07266e-10	Body	TBCD	opensea	17	TBCD	0.753722	2.20375e-19
cg11884933	9.17616e-10	Body	GNA12	shore	7	GNA12	0.638289	1.1878e-12
cg17984638	9.21447e-10	TSS200	TXK	opensea	4	TXK	-0.711946	1.44398e-16
cg21422623	9.21882e-10	Body	ITPKB	opensea	1	ITPKB	-0.655296	1.84922e-13
cg09018107	9.30771e-10	Body	IL12RB2	opensea	1	IL12RB2	-0.588477	1.49783e-10
cg07598385	9.41991e-10	Body	ZFPM1	shelf	16	ZFPM1	0.571467	6.51434e-10
cg24750752	9.52534e-10	TSS200	CD22	opensea	19	CD22	0.559577	1.73367e-09
cg00188748	9.59542e-10	TSS1500	FPGS	shore	9	FPGS	0.766015	2.54109e-20
cg02086286	9.7934e-10	Body	ABCF1	opensea	6	ABCF1	-0.553059	2.91714e-09
cg00219816	9.82629e-10	Body	C8orf37	shore	8	C8orf37	0.55384	2.74254e-09
cg08225986	9.8321e-10	Body	PATZ1	shelf	22	PATZ1	-0.592966	1.00175e-10
cg02789394	9.84966e-10	5'UTR	FYN	shelf	6	FYN	-0.674064	2.05804e-14
cg16283183	9.86337e-10	3'UTR	LIMD1	opensea	3	LIMD1	0.577862	3.78562e-10
cg19139618	9.92405e-10	Body	SKAP1	shelf	17	SKAP1	-0.781202	1.45735e-21
cg16080125	9.97715e-10	Body	GNA12	island	7	GNA12	0.576691	4.18491e-10

## Sheet: S2
S2:Methylated variant gene annotation for discovery dataset（COVID vs Control）
	Gene	Cell_type
shared by 1	CD22	B
shared by 1	LBH	B
shared by 1	IL2RB	NK
shared by 1	TTC38	NK
shared by 1	DGKA	CD4 T
shared by 1	KLRD1	CD4 T
shared by 1	LCK	CD4 T
shared by 1	MAD1L1	CD4 T
shared by 1	MDFIC	CD4 T
shared by 1	ZAP70	CD4 T
shared by 1	ATP1A1	CD8 T
shared by 1	CCDC88C	CD8 T
shared by 1	CD3D	CD8 T
shared by 1	CD52	CD8 T
shared by 1	CUTA	CD8 T
shared by 1	F2R	CD8 T
shared by 1	GZMH	CD8 T
shared by 1	IL7R	CD8 T
shared by 1	PRKCH	CD8 T
shared by 1	RNASEK	CD8 T
shared by 1	RNF4	CD8 T
shared by 1	RORA	CD8 T
shared by 1	SKAP1	CD8 T
shared by 1	SSBP3	CD8 T
shared by 1	TGFBR3	CD8 T
shared by 1	TNF	CD8 T
shared by 1	EPSTI1	CD14 Mono
shared by 1	RALGDS	CD14 Mono
shared by 1	SMAD3	CD14 Mono
shared by 1	ZNF385A	CD14 Mono
shared by 1	SFMBT2	CD16 Mono
shared by 1	ST3GAL5	CD16 Mono
shared by 1	CAMKK2	Neutrophil
shared by 1	CYFIP2	Neutrophil
shared by 1	DOK3	Neutrophil
shared by 1	HNRNPA2B1	Neutrophil
shared by 1	SLC25A37	Neutrophil
shared by 1	SLC8A1	Neutrophil
shared by 1	ABI3	gamma delta T
shared by 1	ACOT7	gamma delta T
shared by 1	AP2A2	gamma delta T
shared by 1	CBX5	gamma delta T
shared by 1	CCR5	gamma delta T
shared by 1	CDC25B	gamma delta T
shared by 1	CHI3L2	gamma delta T
shared by 1	DAZAP1	gamma delta T
shared by 1	DNMT1	gamma delta T
shared by 1	DOCK10	gamma delta T
shared by 1	FLOT1	gamma delta T
shared by 1	GNGT2	gamma delta T
shared by 1	GNL3	gamma delta T
shared by 1	HADH	gamma delta T
shared by 1	HLA-DMB	gamma delta T
shared by 1	HSPB11	gamma delta T
shared by 1	HTT	gamma delta T
shared by 1	LYRM4	gamma delta T
shared by 1	MCM3	gamma delta T
shared by 1	MRPS33	gamma delta T
shared by 1	NOP14	gamma delta T
shared by 1	NSMCE1	gamma delta T
shared by 1	NUCKS1	gamma delta T
shared by 1	OSBPL3	gamma delta T
shared by 1	OXNAD1	gamma delta T
shared by 1	PA2G4	gamma delta T
shared by 1	PHF19	gamma delta T
shared by 1	PRF1	gamma delta T
shared by 1	RBL1	gamma delta T
shared by 1	RNASEH2B	gamma delta T
shared by 1	RPTOR	gamma delta T
shared by 1	SIRPG	gamma delta T
shared by 1	SIT1	gamma delta T
shared by 1	TBCD	gamma delta T
shared by 1	THEMIS	gamma delta T
shared by 1	TP53	gamma delta T
shared by 1	UXS1	gamma delta T
shared by 2	DOK2	CD4 T	CD8 T
shared by 2	EVL	CD4 T	CD16 Mono
shared by 2	UCP2	CD4 T	Neutrophil
shared by 2	RUVBL1	CD4 T	gamma delta T
shared by 2	GIMAP7	CD8 T	CD16 Mono
shared by 2	CCL5	CD8 T	Megakaryocyte
shared by 2	GNLY	CD8 T	gamma delta T
shared by 2	TNFAIP8	CD14 Mono	gamma delta T
shared by 2	ACSL1	CD16 Mono	Neutrophil
shared by 3	TRAF3IP3	NK	CD4 T	gamma delta T
shared by 3	DENND2D	NK	CD4 T	gamma delta T
shared by 3	CD3E	NK	CD8 T	gamma delta T
shared by 3	RUNX3	CD8 T	CD14 Mono	CD16 Mono
shared by 3	DUSP2	CD8 T	CD14 Mono	gamma delta T
shared by 3	IL1R2	Neutrophil	CD14 Mono	CD16 Mono
shared by 5	S100A9	B	NK	CD4 T	CD8 T	gamma delta T
shared by 5	CX3CR1	NK	CD4 T	CD14 Mono	CD16 Mono	gamma delta T

## Sheet: S3
S3:Methylated variant gene annotation for discovery dataset（Mild vs Control）
	Gene	Cell_type
shared by 1	GNLY	CD4 T
shared by 1	AIP	CD8 T
shared by 1	CD2	CD8 T
shared by 1	CD52	CD8 T
shared by 1	CDC25B	CD8 T
shared by 1	DOK2	CD8 T
shared by 1	F2R	CD8 T
shared by 1	GIMAP7	CD8 T
shared by 1	IKZF3	CD8 T
shared by 1	IL2RB	CD8 T
shared by 1	LBH	CD8 T
shared by 1	LDHB	CD8 T
shared by 1	NUCKS1	CD8 T
shared by 1	SKAP1	CD8 T
shared by 1	SSBP3	CD8 T
shared by 1	TCF7	CD8 T
shared by 1	TGFBR3	CD8 T
shared by 1	ABI3	CD14 Mono
shared by 1	CAMKK2	CD14 Mono
shared by 1	CD7	CD14 Mono
shared by 1	RNF220	CD14 Mono
shared by 1	CCDC12	CD16 Mono
shared by 1	CLCF1	CD16 Mono
shared by 1	HNRNPA2B1	CD16 Mono
shared by 1	ILF3	CD16 Mono
shared by 1	LRRC47	CD16 Mono
shared by 1	NR1D1	CD16 Mono
shared by 1	PA2G4	CD16 Mono
shared by 1	RASSF1	CD16 Mono
shared by 1	SFMBT2	CD16 Mono
shared by 1	ST3GAL5	CD16 Mono
shared by 1	TRAF3IP3	CD16 Mono
shared by 1	ACSL1	Neutrophil
shared by 1	CYFIP2	Neutrophil
shared by 1	DOK3	Neutrophil
shared by 1	FLOT1	Neutrophil
shared by 1	IL1R2	Neutrophil
shared by 1	MKNK1	Neutrophil
shared by 1	ACOT7	gamma delta T
shared by 1	AP3M2	gamma delta T
shared by 1	CBX5	gamma delta T
shared by 1	DNMT1	gamma delta T
shared by 1	GZMH	gamma delta T
shared by 1	GZMM	gamma delta T
shared by 1	HADH	gamma delta T
shared by 1	ITK	gamma delta T
shared by 1	MCM3	gamma delta T
shared by 1	NOP14	gamma delta T
shared by 1	PHF19	gamma delta T
shared by 1	RNASEH2B	gamma delta T
shared by 1	RUVBL1	gamma delta T
shared by 1	TBCD	gamma delta T
shared by 1	TP53	gamma delta T
shared by 2	CCL5	CD8 T	gamma delta T
shared by 2	CD3E	CD8 T	gamma delta T
shared by 2	DUSP2	CD8 T	gamma delta T
shared by 2	ETS1	CD8 T	gamma delta T
shared by 2	KLRD1	CD8 T	gamma delta T
shared by 2	PRKCH	CD8 T	gamma delta T
shared by 2	RNASEK	CD8 T	gamma delta T
shared by 2	ITGAL	CD16 Mono	gamma delta T
shared by 2	CD3D	NK	gamma delta T
shared by 3	RORA	NK	CD8 T	gamma delta T
shared by 3	CCDC88C	CD8 T	CD16 Mono	gamma delta T
shared by 4	S100A9	NK	CD4 T	CD8 T	gamma delta T
shared by 4	AHNAK	NK	CD8 T	CD16 Mono	gamma delta T

## Sheet: S4
S4:Methylated variant gene annotation for discovery dataset（Severe vs Control）
	Gene	Cell_type
shared by 1	CD22	B
shared by 1	GNA12	B
shared by 1	RHOH	B
shared by 1	IL2RB	NK
shared by 1	TTC38	NK
shared by 1	ATP1A1	CD4 T
shared by 1	CD2	CD4 T
shared by 1	CLUAP1	CD4 T
shared by 1	DOK2	CD4 T
shared by 1	FBLN5	CD4 T
shared by 1	ITGB7	CD4 T
shared by 1	KLRD1	CD4 T
shared by 1	MDFIC	CD4 T
shared by 1	NFATC2	CD4 T
shared by 1	NMT2	CD4 T
shared by 1	PASK	CD4 T
shared by 1	SCML4	CD4 T
shared by 1	CD3D	CD8 T
shared by 1	CD3E	CD8 T
shared by 1	FBXO32	CD8 T
shared by 1	RNF4	CD8 T
shared by 1	SSBP3	CD8 T
shared by 1	TNF	CD8 T
shared by 1	TXNL4A	CD8 T
shared by 1	MALT1	CD14 Mono
shared by 1	RALGDS	CD14 Mono
shared by 1	TTC39C	CD14 Mono
shared by 1	ZNF385A	CD14 Mono
shared by 1	LILRB1	CD16 Mono
shared by 1	SFMBT2	CD16 Mono
shared by 1	ST3GAL5	CD16 Mono
shared by 1	CAMKK2	Neutrophil
shared by 1	CYFIP2	Neutrophil
shared by 1	DOK3	Neutrophil
shared by 1	SLC25A37	Neutrophil
shared by 1	SLC8A1	Neutrophil
shared by 1	SYNE2	Neutrophil
shared by 1	ABCF1	gamma delta T
shared by 1	ABI3	gamma delta T
shared by 1	ACOT7	gamma delta T
shared by 1	AP2A2	gamma delta T
shared by 1	CBX5	gamma delta T
shared by 1	CCR5	gamma delta T
shared by 1	CDC25B	gamma delta T
shared by 1	CSRP1	gamma delta T
shared by 1	DAZAP1	gamma delta T
shared by 1	DNMT1	gamma delta T
shared by 1	DOCK10	gamma delta T
shared by 1	FLOT1	gamma delta T
shared by 1	GNGT2	gamma delta T
shared by 1	HADH	gamma delta T
shared by 1	HLA-DMB	gamma delta T
shared by 1	HSPB11	gamma delta T
shared by 1	HTT	gamma delta T
shared by 1	ILF3	gamma delta T
shared by 1	LYRM4	gamma delta T
shared by 1	MRPS33	gamma delta T
shared by 1	NOP14	gamma delta T
shared by 1	NSMCE1	gamma delta T
shared by 1	NUCKS1	gamma delta T
shared by 1	NUDCD3	gamma delta T
shared by 1	NUP210	gamma delta T
shared by 1	OSBPL3	gamma delta T
shared by 1	OXNAD1	gamma delta T
shared by 1	PA2G4	gamma delta T
shared by 1	PCK2	gamma delta T
shared by 1	PHF19	gamma delta T
shared by 1	RBL1	gamma delta T
shared by 1	RPTOR	gamma delta T
shared by 1	STK39	gamma delta T
shared by 1	TBCD	gamma delta T
shared by 1	TCOF1	gamma delta T
shared by 1	TP53	gamma delta T
shared by 1	TSPAN5	gamma delta T
shared by 1	UXS1	gamma delta T
shared by 1	CCL5	Megakaryocyte
shared by 2	LBH	B	CD4 T
shared by 2	TRAF5	B	CD4 T
shared by 2	CD7	NK	CD4 T
shared by 2	MAD1L1	NK	CD4 T
shared by 2	CHI3L2	CD4 T	gamma delta T
shared by 2	LCK	CD4 T	gamma delta T
shared by 2	MCM3	CD4 T	gamma delta T
shared by 2	PRF1	CD4 T	gamma delta T
shared by 2	RUVBL1	CD4 T	gamma delta T
shared by 2	SIRPG	CD4 T	gamma delta T
shared by 2	SIT1	CD4 T	gamma delta T
shared by 2	THEMIS	CD4 T	gamma delta T
shared by 2	GNLY	CD8 T	CD14 Mono
shared by 2	SMAD3	CD14 Mono	CD16 Mono
shared by 2	IL1R2	CD14 Mono	Neutrophil
shared by 2	ACSL1	CD16 Mono	Neutrophil
shared by 3	RNASEH2B	B	NK	gamma delta T
shared by 3	SPOCK2	B	CD8 T	gamma delta T
shared by 3	TNFAIP8	B	Neutrophil	gamma delta T
shared by 3	ZAP70	NK	CD4 T	CD8 T
shared by 3	EVL	NK	CD4 T	CD16 Mono
shared by 3	DENND2D	NK	CD4 T	gamma delta T
shared by 3	GIMAP7	CD4 T	CD14 Mono	CD16 Mono
shared by 3	RUNX3	CD8 T	CD14 Mono	CD16 Mono
shared by 3	UCP2	CD4 T	Neutrophil	gamma delta T
shared by 4	S100A9	B	NK	CD4 T	gamma delta T
shared by 4	TRAF3IP3	B	NK	CD4 T	gamma delta T
shared by 5	LFNG	NK	CD4 T	CD8 T	CD14 Mono	gamma delta T
shared by 5	CX3CR1	NK	CD4 T	CD16 Mono	CD14 Mono	gamma delta T

## Sheet: S5
S5:Methylated variant gene annotation for validation dataset（COVID vs Control）
	Gene	Cell_type
shared by 1	DUSP2	NK
shared by 1	GZMH	CD8 T
shared by 1	HLA-DMB	CD14 mono
shared by 1	NUP210	CD14 mono
shared by 1	DOK3	Eosinophil
shared by 1	PTDSS1	Eosinophil
shared by 1	ITGB7	Neutrophil
shared by 1	SMPD3	Neutrophil
shared by 1	SYNE2	Neutrophil
shared by 1	CLSTN1	gamma delta T
shared by 1	RASA3	gamma delta T
shared by 1	RNF157	gamma delta T
shared by 1	SCML4	gamma delta T
shared by 1	SLFN12L	gamma delta T
shared by 1	STX18	gamma delta T
shared by 1	TXK	gamma delta T
shared by 2	CD52	NK	Neutrophil
shared by 2	IL1R2	CD8 T	Neutrophil
shared by 3	S100A9	CD4 T	CD8 T	gamma delta T
shared by 3	SLC25A37	CD14 mono	Eosinophil	gamma delta T
shared by 3	EPSTI1	CD14 mono	Neutrophil	Megakaryocyte

## Sheet: S6
S6:Methylated variant gene annotation for validation dataset（Mild vs Control）
	Gene	Cell_type
shared by 1	CD3E	NK
shared by 1	DUSP2	CD14 mono
shared by 1	NSMCE1	CD14 mono
shared by 1	SLC20A2	CD14 mono
shared by 1	TRAF3IP3	Eosinophil
shared by 1	AHNAK	Neutrophil
shared by 1	FLOT1	Neutrophil
shared by 1	IMMP2L	Neutrophil
shared by 1	SMPD3	Neutrophil
shared by 1	SYNE2	Neutrophil
shared by 1	CLSTN1	gamma delta T
shared by 1	ITGAL	gamma delta T
shared by 1	RASA3	gamma delta T
shared by 1	SLFN12L	gamma delta T
shared by 1	STX18	gamma delta T
shared by 1	ZBTB25	gamma delta T
shared by 2	GZMH	NK	gamma delta T
shared by 3	IL1R2	CD8 T	Neutrophil	Eosinophil
shared by 4	EPSTI1	CD4 T	CD16 mono	Neutrophil	Megakaryocyte
shared by 5	S100A9	B	CD4 T	CD8 T	Neutrophil	gamma delta T
shared by 5	CD52	NK	CD8 T	CD14 mono	Neutrophil	gamma delta T
shared by 6	SLC25A37	B	NK	CD14 mono	Eosinophil	Neutrophil	gamma delta T

## Sheet: S7
S7:Methylated variant gene annotation for validation dataset（Severe vs Control）
	Gene	Cell_type
shared by 1	FBXO32	CD4 T
shared by 1	TMC8	CD4 T
shared by 1	LCK	CD8 T
shared by 1	CAMKK2	Eosinophil
shared by 1	HLA-DMB	CD14 mono
shared by 1	NFATC1	CD14 mono
shared by 1	NUP210	CD14 mono
shared by 1	RBM47	CD14 mono
shared by 1	ZNF385A	CD14 mono
shared by 1	UBAC2	CD16 mono
shared by 1	CLSTN1	gamma delta T
shared by 1	DUSP2	gamma delta T
shared by 1	LDHB	gamma delta T
shared by 1	S100A9	gamma delta T
shared by 1	SLFN12L	gamma delta T
shared by 2	SYNE2	CD4 T	Neutrophil
shared by 2	NFIL3	CD14 mono	CD16 mono
shared by 2	MKNK1	CD14 mono	gamma delta T
shared by 2	SLC25A37	Eosinophil	gamma delta T
shared by 3	ACSL1	CD14 mono	CD16 mono	Neutrophil
shared by 3	FLOT1	CD14 mono	CD16 mono	Eosinophil
shared by 4	EPSTI1	CD4 T	CD14 mono	CD16 mono	Neutrophil
